# Supplementary material for: Multiferroicity driven by single-atom adsorption on the two-dimensional semiconductor ScCl3
Source: Royal Society of Chemistry journal article supplement (doi:10.1039/d4cp00863d), 2024-01-01
Supplement: d4cp00863d1.pdf [file d4cp00863d1.pdf]

## Supporting Information

### Multiferroicity driven by single-atom adsorption on the two-dimensional semiconductor $\text{ScCl}_3$

Yu Liang<sup>†</sup>, Huasheng Sun<sup>†</sup>, Xiang Li<sup>†</sup>, Leichuang Zhu<sup>†</sup>, Menghao Bi<sup>†</sup>, Zhenxiao Du<sup>†</sup>,  
Chengxi Huang<sup>\*,‡</sup>, Fang Wu<sup>\*,†</sup>

<sup>†</sup> College of Information Science and Technology, Nanjing Forestry University, Nanjing, Jiangsu 210037, P. R. China

<sup>‡</sup> MIIT Key Laboratory of Semiconductor Microstructure and Quantum Sensing, and Department of Applied Physics, Nanjing University of Science and Technology, Nanjing 210094, People's Republic of China

\*Corresponding author. Email address: fangwu@njfu.edu.cn; chuang@njust.edu.cn.

**Table S1.** The electronic bandgap (G), electric polarization (P) and magnetic anisotropic energy (MAE) of the  $\text{K@ScCl}_3$  at different U values.

| $\text{K@ScCl}_3$ | U(eV) | G(eV) | P(pC·m <sup>-1</sup> ) | MAE(meV) |
|-------------------|-------|-------|------------------------|----------|
| Hollow-1          | 1     | 0.816 | 7.29                   | 0.22     |
|                   | 2     | 0.782 | 7.13                   | 0.24     |
|                   | 3     | 0.752 | 6.91                   | 0.26     |
|                   | 4     | 1.264 | 5.19                   | 0.83     |
|                   | 4.7   | 1.736 | 4.65                   | 0.91     |
|                   | 5     | 1.292 | 4.51                   | 0.95     |

**Table S2.** The adsorption energies of different structures  $\text{K@ScCl}_3$  at different U values. The Cl-top structure always automatically converges to the Hollow-1 structure after structural relaxation.

| U(eV)             | $E_b$ (eV) |          |        |        |        |
|-------------------|------------|----------|--------|--------|--------|
|                   | Hollow-1   | Hollow-2 | Sc-top | Cl-top |        |
| $\text{K@ScCl}_3$ | 1          | -2.022   | -1.884 | -1.272 | -2.022 |
|                   | 2          | -2.013   | -1.889 | -1.230 | -2.013 |
|                   | 3          | -1.990   | -1.956 | -1.173 | -1.990 |
|                   | 4          | -2.083   | -2.056 | -1.138 | -2.083 |
|                   | 4.7        | -2.184   | -2.203 | -1.106 | -2.184 |
|                   | 5          | -2.219   | -2.203 | -1.106 | -2.219 |

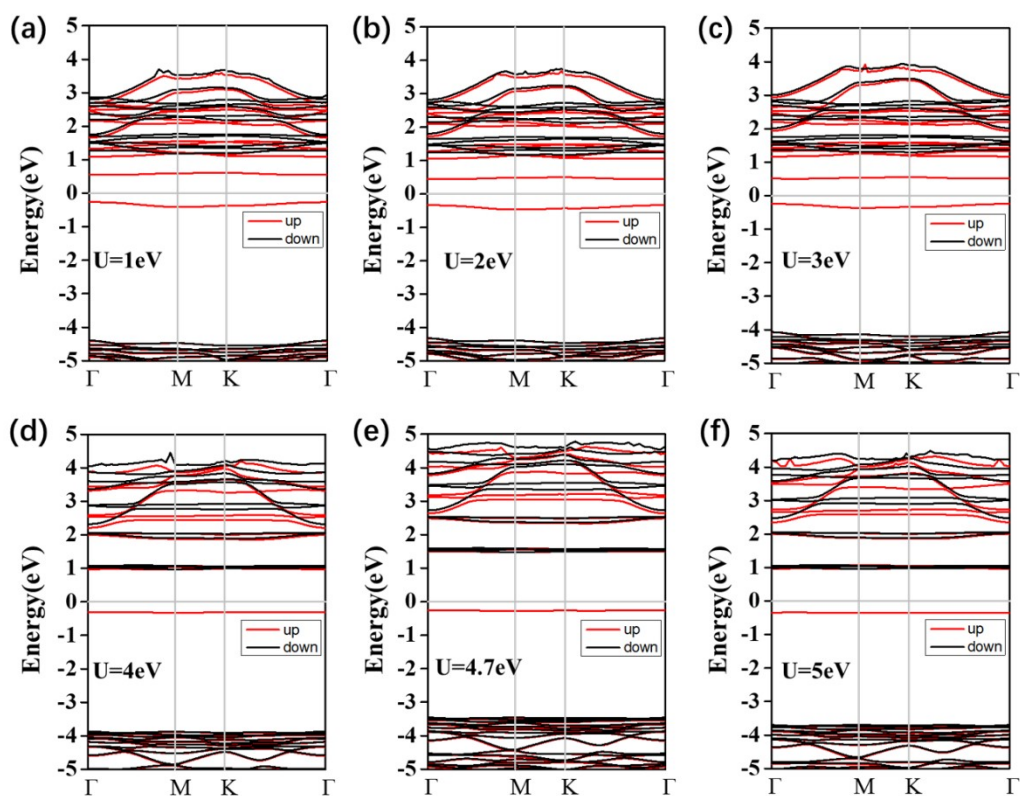

Figure S1. (a-f) The band structures of  $\text{K@ScCl}_3$  with  $U$  values ranging from 1 to 5 eV.

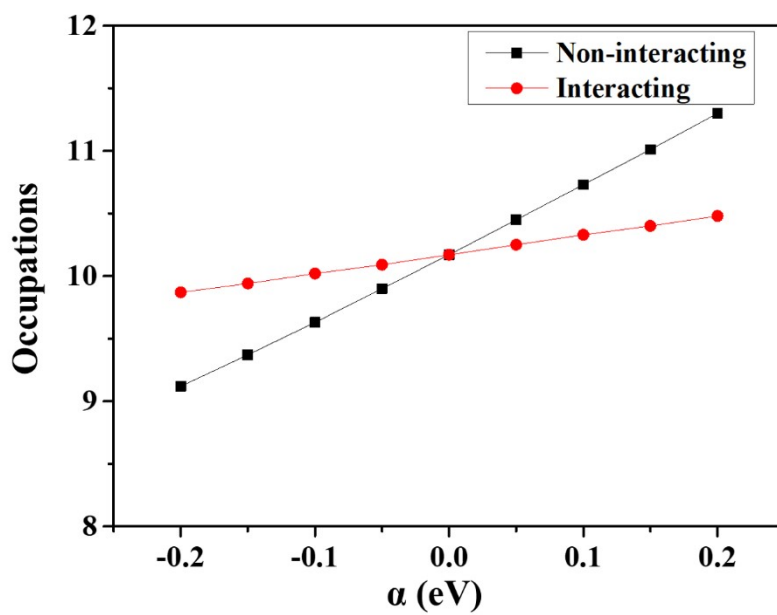

Figure S2. The interacting and non-interacting Kohn-Sham response for  $\text{K@ScCl}_3$ .
